# Supplementary material for: Rearrangement of protein structures on a gold nanoparticle surface is regulated by ligand adsorption modes
Source: Royal Society of Chemistry journal article supplement (doi:10.1039/d1nr04813a), 2021-01-01
Supplement: d1nr04813a1.pdf [file d1nr04813a1.pdf]

## **Rearrangement of protein structures on a gold nanoparticle surface is regulated by ligand adsorption modes †**

Xiaofeng Wang,<sup>‡a</sup> Rong Lei,<sup>‡b</sup> Limei Li,<sup>‡a, c</sup> Xinyu Fei,<sup>c</sup> Rui Ju,<sup>c</sup> Xiwen Sun,<sup>c</sup> Huiying Cao,<sup>c</sup> Qingfang Zhang,<sup>\*,a</sup> Chunying Chen,<sup>\*, d</sup> and Xinyi Wang<sup>\*,a, c</sup>

*<sup>a</sup> School of Life Science and Biotechnology, Dalian University, Dalian, 116622, China.*

*E-mail: wangxinyi163@163.com*

*<sup>b</sup> Institute of Plant Quarantine, Chinese Academy of Inspection and Quarantine, Beijing, 100176, China.*

*<sup>c</sup> College of Land and Environment, Shenyang Agricultural University, Shenyang, 110866, China.*

*E-mail: wangxinyi163@163.com*

*<sup>d</sup> CAS Key Laboratory for Biomedical Effects of Nanomaterials and Nanosafety, &CAS Center for Excellence in Nanoscience, National Center for Nanoscience and Technology of China, and University of Chinese Academy of Sciences, Beijing, 100190, China.*

† Electronic supplementary information (ESI) available. Material characterization, Protein adsorption analysis by DLS, Measurement of protein secondary structures by ART-FTIR, Thermodynamic measurements by fluorescence quenching, and Computer simulation of the conformational changes and energy levels at nano-protein interface are all included in ESI.

‡ These authors contributed equally to this work.

Table S1. Methods and techniques for examining the structure and composition of protein corona.

| Corona parameter      | Techniques                                                                                                                                                                                                                                                                                                                                                                                                                          | References              |
|-----------------------|-------------------------------------------------------------------------------------------------------------------------------------------------------------------------------------------------------------------------------------------------------------------------------------------------------------------------------------------------------------------------------------------------------------------------------------|-------------------------|
| Thickness             | Transmission electron microscopy (TEM) <sup>1-7</sup> , Dynamic light scattering (DLS) <sup>1, 3, 5-14</sup> , Field Flow Fractionation (FFF) <sup>15</sup> , Electrospray-Differential Mobility Analysis (ES-DMA) <sup>16</sup> , Fluorescence correlation spectroscopy (FCS) <sup>17</sup> , Small-angle X-ray scattering (SAXS) <sup>18-20</sup> , Fluorescence correlation spectroscopy <sup>21</sup>                           | 1-7, 14-21              |
| Density               | UV-Vis spectrophotometry <sup>1, 7, 12</sup> , Scanning Electron Microscopy (SEM) <sup>11,22</sup> , Atomic force microscopy (AFM) <sup>22</sup>                                                                                                                                                                                                                                                                                    | 1, 7, 11, 12, 22        |
| Identity and quantity | SDS-PAGE <sup>2, 5, 7-9</sup> , Liquid chromatography tandem mass spectrometry (LC-MS/MS) <sup>5, 10, 13, 23, 24</sup> , ESI-MS <sup>25</sup>                                                                                                                                                                                                                                                                                       | 2,5,7-9, 10, 13, 23-25  |
| Conformation          | CD spectroscopy <sup>26, 27</sup> , Polarization modulation-infrared reflection-adsorption spectroscopy (PM-IRRAS) <sup>6</sup> , Computational simulation <sup>18, 28</sup> , Fourier transform infrared spectroscopy (FTIR) <sup>27, 28</sup> , X-ray photoelectron spectroscopy (XPS) <sup>11</sup> , Molecular dynamic (MD) simulation <sup>14</sup> , Attenuated total reflection infrared spectroscopy (ATR-IR) <sup>14</sup> | 6,11,14,18,26-28        |
| Affinity              | Zeta potential <sup>3, 11, 12, 23, 29</sup> , MP-SPR <sup>6, 22</sup> , Isothermal titration calorimetry (ITC) <sup>5</sup> , Electrophoretic light scattering (ELS) <sup>10</sup>                                                                                                                                                                                                                                                  | 3,5,6,10-12, 22, 23, 29 |

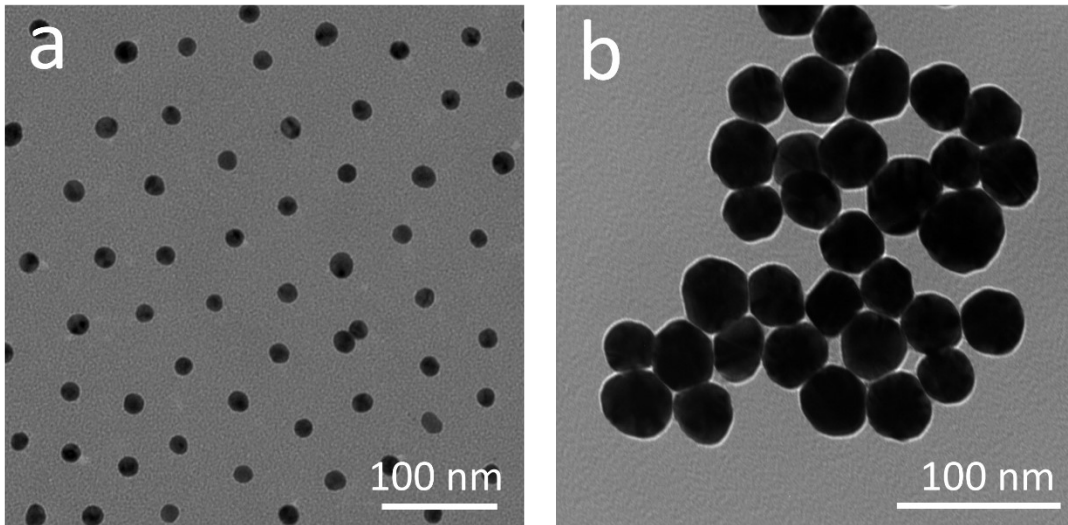

Fig. S1. Representative TEM image of Cit-AuNPs. (a) The average diameter of seed particles was measured to be  $20 \pm 2.6$  nm ( $n=100$ ). (b) The average diameter of Cit-AuNPs was measured to be  $45.4 \pm 3.9$  nm ( $n=100$ ).

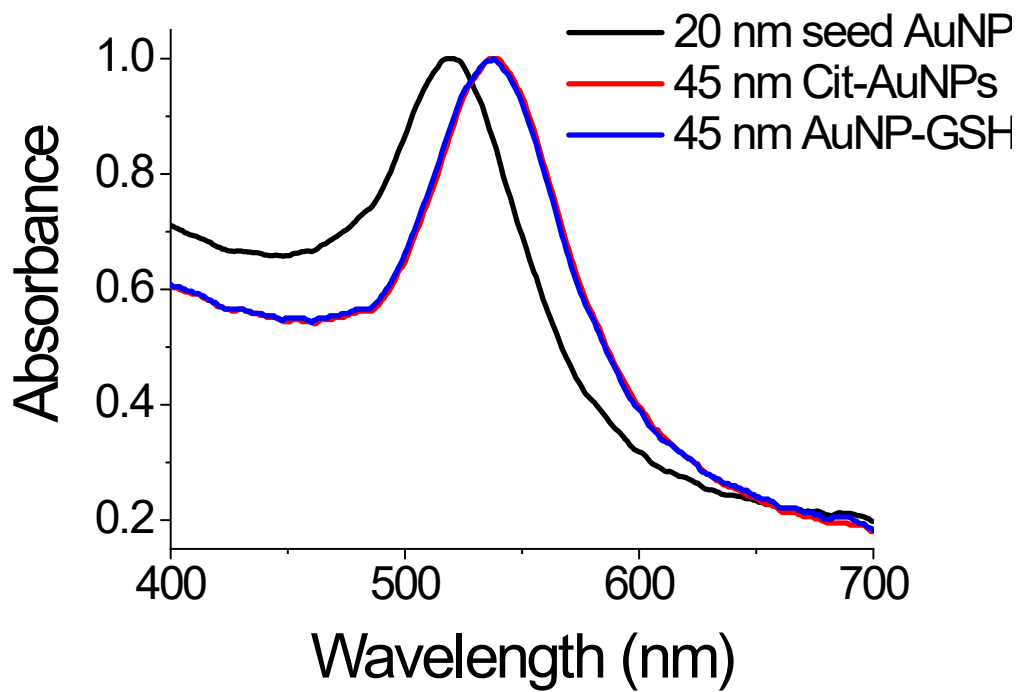

Fig. S2. The plasmon absorption spectra of AuNPs with various surface modifications.

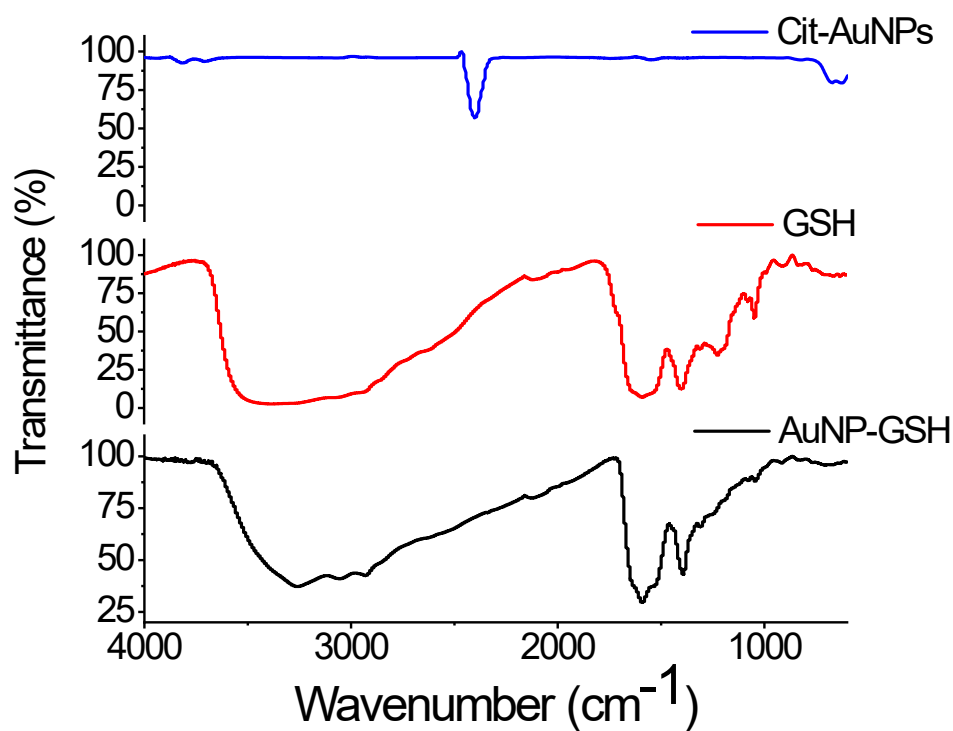

Fig. S3. FT-IR spectra of Cit-AuNPs and GSH-modified AuNPs(AuNP-GSH). The characteristic peaks of GSH appeared in the spectrum of AuNP-GSH, indicate the chemical modification of GSH onto the surface of AuNPs.

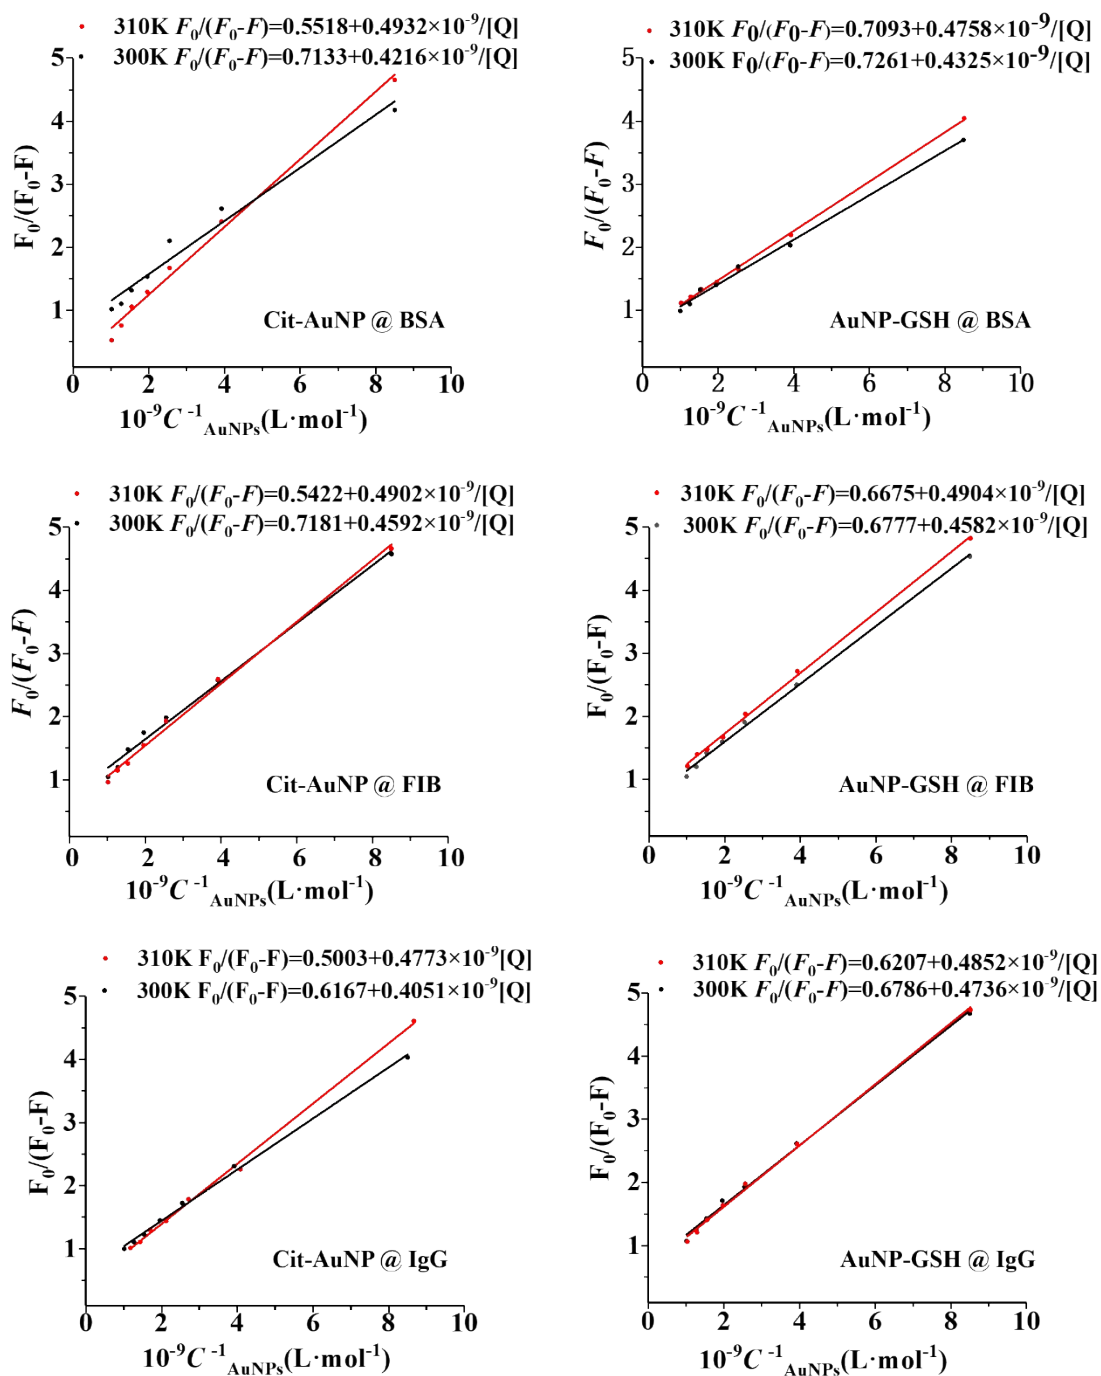

Fig. S4. Modified Stern-Volmer plots for the fluorescence quenching of three proteins by Cit-AuNPs or AuNP-GSH at different temperatures. The concentration of protein was fixed at  $1.5 \mu\text{M}$  and the concentrations of various AuNPs were from 0 to 15 nM.

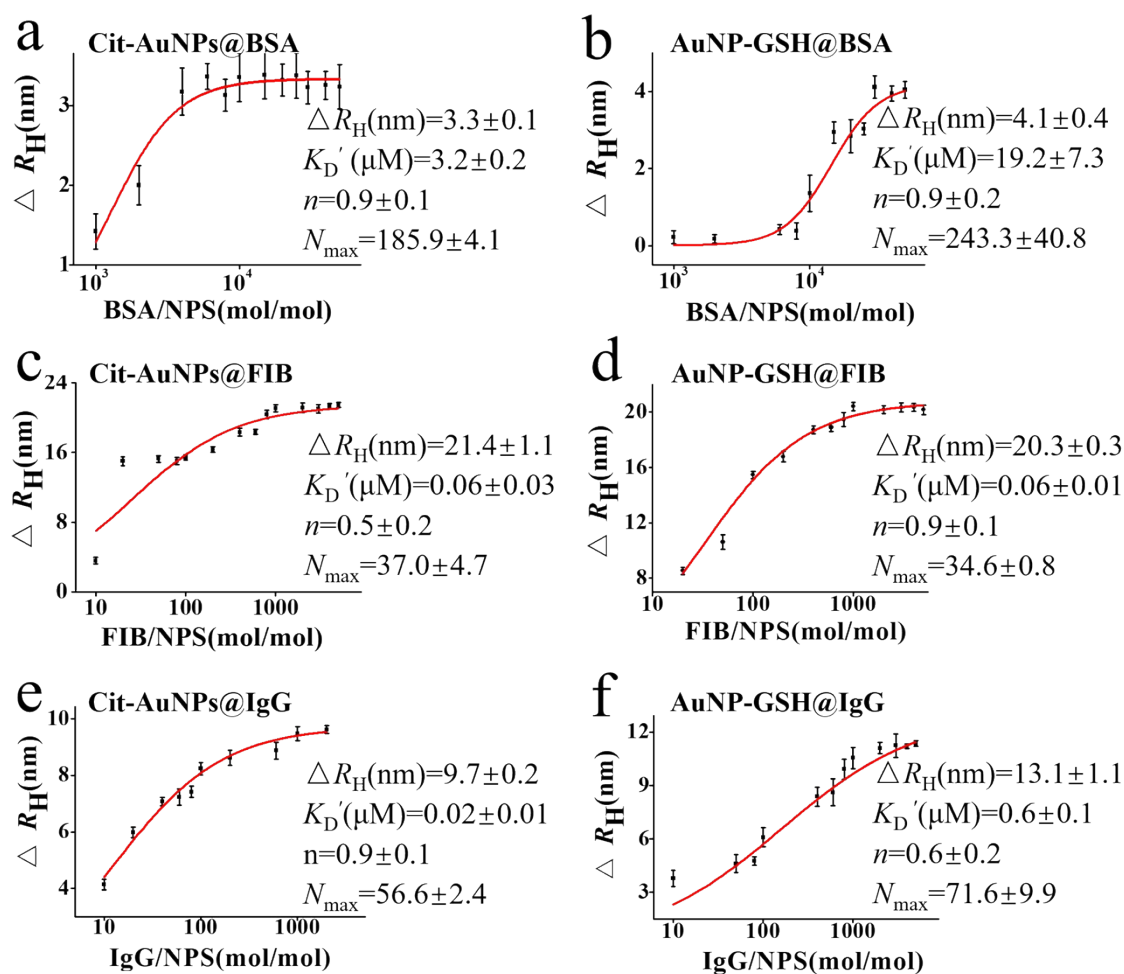

Fig. S5. Adsorption analysis of three plasma proteins onto Cit-AuNPs or AuNP-GSH. The hydrodynamic radius changes of Cit-AuNP@BSA (a), AuNP-GSH@BSA (b), Cit-AuNP@FIB (c), AuNP-GSH@FIB (d), Cit-AuNP@IgG (e) and AuNP-GSH@IgG (f), were plotted as a function of the corresponding concentrations of proteins, respectively. The final concentrations of all AuNPs (45 nm) were fixed at 1.5 nmol/L, and the DLS measurement was performed after incubating AuNPs with the desired concentrations of plasma proteins for 2 h at room temperature. The curves were fitted based on the Hill equation (red solid lines), and the best-fit parameters are listed on the right. All data are the mean $\pm$ SD of three replicates.

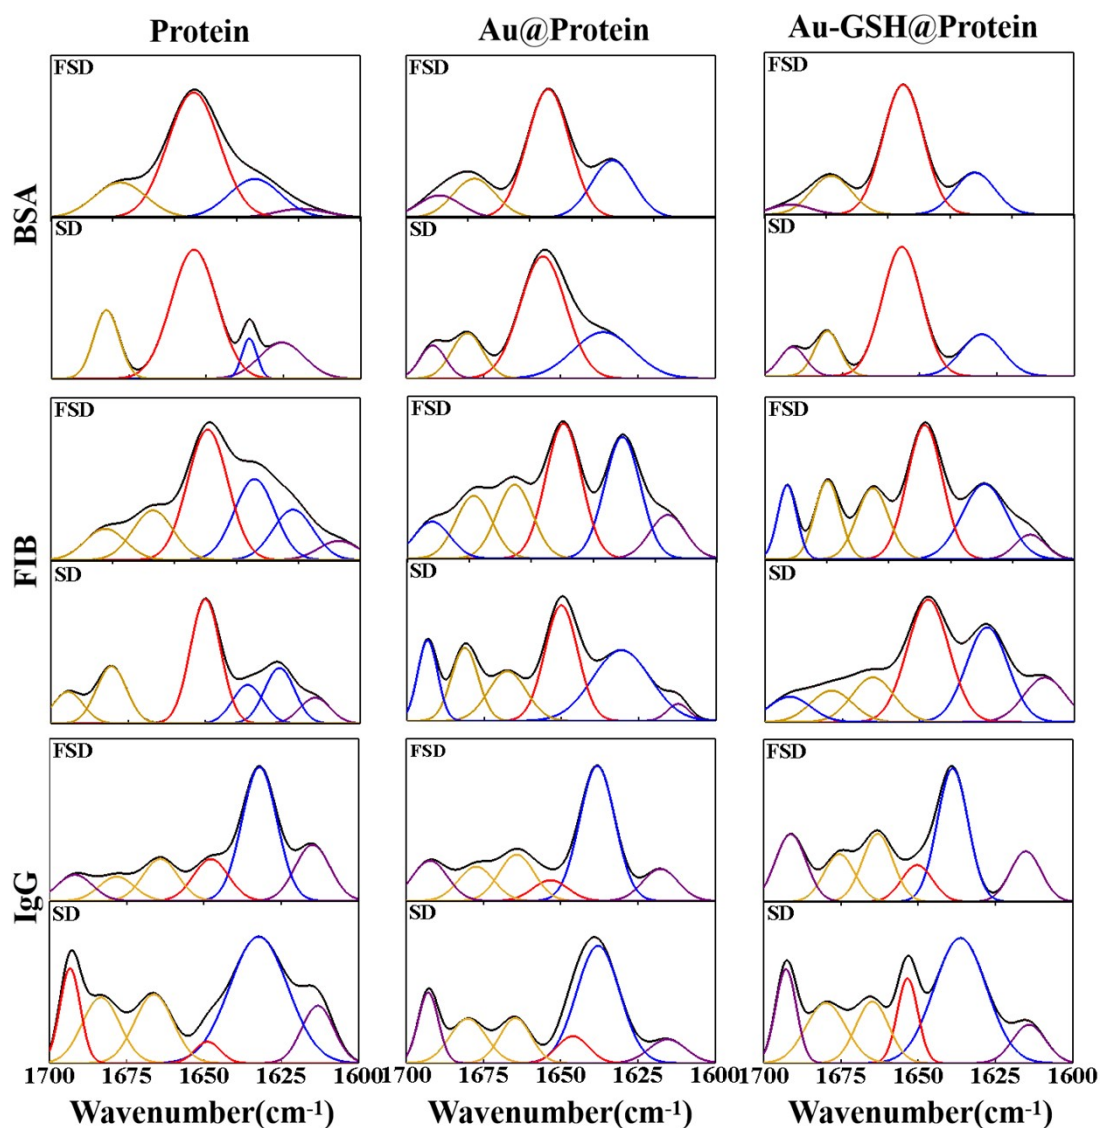

Fig. S6. ART-FTIR analysis of secondary structures of adsorbed plasma proteins on AuNPs with ligand-physorbed or chemisorbed surfaces. Curve-fitted inverted SD and curve-fitted inverted FSD of amide I spectra were selected as the interest region for studying secondary structures of adsorbed proteins. The curve fitting was implemented by the OMNIC software (<http://www.thermoscientific.com/en/products/fourier-transform-infrared-spectroscopy-ftir.html>).



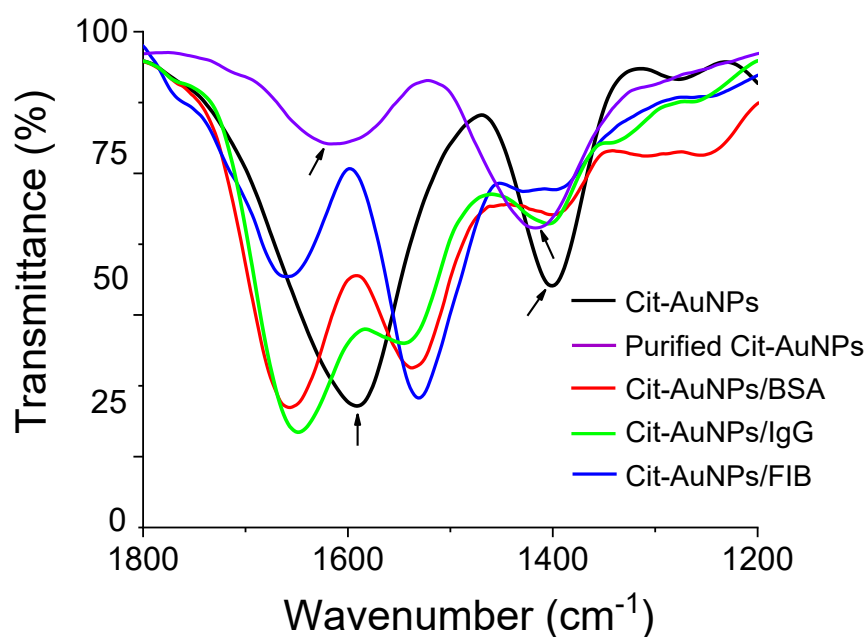

Fig. S7 ATR-IR spectra of Cit-AuNPs, purified Cit-AuNPs, and the Cit-AuNPs after incubating with excess proteins (BSA, IgG and FIB) at the frequency region of  $\nu_{\text{sy}}(\text{COO}^-)$  and  $\nu_{\text{asy}}(\text{COO}^-)$  vibrations. The peaks of  $\nu_{\text{sy}}(\text{COO}^-)$  at  $\sim 1590 \text{ cm}^{-1}$  and  $\nu_{\text{asy}}(\text{COO}^-)$  at  $\sim 1390 \text{ cm}^{-1}$  disappear upon the addition of the proteins (arrowed), indicating the replacement of citrates by the adsorbed proteins on the nanosurface.

Table S2. Percentage distributions of secondary structures of proteins before and after interaction with Cit-AuNPs or AuNP-GSH as determined by FTIR spectroscopy.

| Protein       | Method             | Secondary structures (%) |                |               |          |
|---------------|--------------------|--------------------------|----------------|---------------|----------|
|               |                    | $\alpha$ -helix          | $\beta$ -sheet | $\beta$ -turn | other    |
| BSA           | X-ray <sup>a</sup> | 74.9                     | 3.1            | 1.4           | 20.6     |
|               | FSD <sup>b</sup>   | 61.0±2.0                 | 13.8±1.5       | 17.3±0.5      | 7.8±0.5  |
|               | SD <sup>c</sup>    | 60.3±1.4                 | 14.3±2.0       | 18.5±3.2      | 7.0±1.6  |
| Cit-AuNPs@BSA | FSD <sup>b</sup>   | 52.6±3.2                 | 21.5±1.6       | 18.2±2.3      | 7.7±3.6  |
|               | SD <sup>c</sup>    | 53.1±2.6                 | 22.7±8.1       | 17.8±5.1      | 6.3±2.1  |
| AuNP-GSH@BSA  | FSD <sup>b</sup>   | 57.4±2.4                 | 19.5±1.3       | 17.0±0.6      | 6.2±3.4  |
|               | SD <sup>c</sup>    | 58.2±2.3                 | 18.9±1.8       | 15.0±2.3      | 7.9±1.1  |
| FIB           | X-ray <sup>a</sup> | \                        | \              | \             | \        |
|               | FSD <sup>b</sup>   | 35.5±2.5                 | 35.4±2.1       | 13.5±0.3      | 15.6±3.5 |
|               | SD <sup>c</sup>    | 35.1±2.3                 | 36.8±1.0       | 15.8±1.4      | 12.4±4.0 |
| Cit-AuNPs@FIB | FSD <sup>b</sup>   | 27.1±2.3                 | 39.1±1.8       | 18.2±3.5      | 15.6±2.9 |
|               | SD <sup>c</sup>    | 27.1±0.9                 | 42.1±0.6       | 23.7±1.8      | 7.1±1.4  |
| AuNP-GSH@FIB  | FSD <sup>b</sup>   | 31.6±1.9                 | 36.8±1.6       | 13.3±1.7      | 18.3±0.6 |
|               | SD <sup>c</sup>    | 31.8±1.7                 | 37.7±1.3       | 15.0±1.2      | 17.5±1.5 |
| IgG           | X-ray <sup>a</sup> | \                        | \              | \             | \        |
|               | FSD <sup>b</sup>   | 14.3±1.3                 | 42.4±1.4       | 29.9±2.3      | 13.4±1.3 |
|               | SD <sup>c</sup>    | 14.5±0.4                 | 43.7±2.1       | 28.5±3.7      | 13.3±2.5 |
| Cit-AuNPs@IgG | FSD <sup>b</sup>   | 8.8±2.2                  | 47.2±3.1       | 28.1±3.1      | 15.9±4.0 |
|               | SD <sup>c</sup>    | 7.8±1.6                  | 47.5±2.2       | 27.2±2.2      | 17.6±0.7 |
| AuNP-GSH@IgG  | FSD <sup>b</sup>   | 12.6±3.1                 | 44.6±0.8       | 28.0±2.3      | 14.8±1.1 |
|               | SD <sup>c</sup>    | 12.2±1.1                 | 45.8±3.1       | 31.4±3.1      | 10.6±1.1 |

<sup>a</sup>Data from X-ray structure; <sup>b</sup>Data from second-derivative FTIR analysis; <sup>c</sup>Data from Fourier self-deconvolution FTIR analysis.

---

Table S3. Assignment of amide I band frequencies to secondary structure of protein.

| Mean frequencies( $\text{cm}^{-1}$ ) | Secondary structures |
|--------------------------------------|----------------------|
| $1,624 \pm 1.0$                      | $\beta$ -sheet       |
| $1,627 \pm 2.0$                      | $\beta$ -sheet       |
| $1,633 \pm 2.0$                      | $\beta$ -sheet       |
| $1,638 \pm 2.0$                      | $\beta$ -sheet       |
| $1,642 \pm 1.0$                      | $\beta$ -sheet       |
| $1,648 \pm 2.0$                      | Random               |
| $1,656 \pm 2.0$                      | $\alpha$ -helix      |
| $1,663 \pm 3.0$                      | $3_{10}$ -helix      |
| $1,667 \pm 1.0$                      | $\beta$ -turn        |
| $1,675 \pm 1.0$                      | $\beta$ -turn        |
| $1,680 \pm 2.0$                      | $\beta$ -turn        |
| $1,685 \pm 2.0$                      | $\beta$ -turn        |
| $1,691 \pm 2.0$                      | $\beta$ -sheet       |
| $1,696 \pm 2.0$                      | $\beta$ -sheet       |

Table S4. The interaction energy at nano-protein interface.

| Protein | On Cit-AuNP     |                   | On AuNP-GSH     |                 |
|---------|-----------------|-------------------|-----------------|-----------------|
|         | Param1 (kJ/mol) | Param2 (kJ/mol)   | Param1 (kJ/mol) | Param2 (kJ/mol) |
| BSA     | -4365.02±96.26  | -8672.37±87.18007 | -538.70±109.10  | -991.45±174.88  |
| FIB     | -7921.27±119.16 | -14025.62±494.35  | -2510.01±275.34 | -3431.85±221.11 |
| IgG     | -5196.66±105.08 | -12642.40±224.3   | -1292.17±127.91 | -1643.63±407.77 |

Table S5. Changes in the internal energy of protein at nano-protein interface.

| Protein | Free protein<br>(kJ/mol) | On Cit-AuNP        |                    | On AuNP-GSH        |                    |
|---------|--------------------------|--------------------|--------------------|--------------------|--------------------|
|         |                          | Param1<br>(kJ/mol) | Param2<br>(kJ/mol) | Param1<br>(kJ/mol) | Param2<br>(kJ/mol) |
| BSA     | -76343.9 ±               | -88037.4 ±         | -86475.6 ±         | -77594.9 ±         | -77220.1 ±         |
|         | 291.4                    | 364.6              | 331.5              | 382.8              | 435.8              |
| FIB     | -133984.3 ±              | -135616.6 ±        | -133341.6 ±        | -135462.3 ±        | -135145.6 ±        |
|         | 340.9                    | 640.9              | 835.9              | 379.1              | 470.1              |
| IgG     | -134535.7                | -136766.8 ±        | -132995.9 ±        | -136284.6 ±        | -135873.1 ±        |
|         | ±415.3                   | 599.1              | 395.2              | 487.8              | 367.8              |

Table S6. Changes in the H-bond amount of protein at nano-protein interface.

| Protein | Free protein | On Cit-AuNP  |              | On AuNP-GSH  |              |
|---------|--------------|--------------|--------------|--------------|--------------|
|         |              | Param1       | Param2       | Param1       | Param2       |
| BSA     | 326.0 ± 4.5  | 374.4 ± 8.4  | 336.8 ± 10.2 | 348.9 ± 12.1 | 340.2 ± 11.3 |
| FIB     | 543.9 ± 13.4 | 584.0 ± 15.0 | 547.5 ± 18.8 | 555.0 ± 13.9 | 558.5 ± 14.8 |
| IgG     | 589.8 ± 16.7 | 619.8 ± 20.6 | 571.2 ± 16.0 | 606.6 ± 15.2 | 611.4 ± 16.8 |

Table S7. Changes in the salt-bridge amount of protein at nano-protein interface.

| Protein | Free protein | On Cit-AuNP |            | On AuNP-GSH |             |
|---------|--------------|-------------|------------|-------------|-------------|
|         |              | Param1      | Param2     | Param1      | Param2      |
| BSA     | 66.1 ± 6.1   | 80.9 ± 6.6  | 74.1 ± 5.2 | 75.6 ± 6.8  | 75.4 ± 6.7  |
| FIB     | 92.0 ± 6.2   | 109.8 ± 7.2 | 89.8 ± 6.7 | 109.5 ± 7.0 | 110.8 ± 7.1 |
| IgG     | 71.9 ± 16.8  | 77.6 ± 6.2  | 67.8 ± 5.2 | 74.8 ± 7.6  | 64.2 ± 6.2  |

Table S8. MD simulating the formation of  $\beta$ -sheet structure of three proteins at nano-protein interface.

| No. | On Cit-AuNP                                       |                                                   | On AuNP-GSH                                       |                                                   |
|-----|---------------------------------------------------|---------------------------------------------------|---------------------------------------------------|---------------------------------------------------|
|     | FIB                                               | IgG                                               | FIB                                               | IgG                                               |
| 1   | ChainB-ASN411-<br>Main.....ChainB-<br>VAL436-Main | ChainA-GLN16-<br>Side.....ChainA-<br>SER13-Side   | ChainB-CYS65-<br>Main.....ChainB-<br>LEU75-Main   | ChainA-ASN173-<br>Side.....ChainB-<br>PRO171-Main |
| 2   | ChainB-ASP69-<br>Main.....ChainB-<br>HIS67-Side   | ChainA-ILE140-<br>Main.....ChainA-<br>ALA178-Main | ChainB-ILE203-<br>Main.....ChainC-<br>LEU218-Main | ChainA-GLU136-<br>Main.....ChainA-<br>LEU182-Main |
| 3   | ChainB-GLY274-<br>Main.....ChainC-<br>GLN136-Main | ChainA-LEU4-<br>Main.....ChainA-<br>PHE101-Main   | ChainC-GLY188-<br>Main.....ChainC-<br>ASP185-Main | ChainA-ILE140-<br>Main.....ChainA-<br>ALA178-Main |
| 4   | ChainB-THR280-<br>Main.....ChainB-<br>TYR285-Main | ChainA-THR118-<br>Main.....ChainA-<br>SER141-Main | ChainC-VAL143-<br>Main.....ChainC-<br>ASP141-Side | ChainA-LEU182-<br>Main.....ChainA-<br>GLU136-Main |
| 5   | ChainB-VAL436-<br>Main.....ChainB-<br>ASN411-Main | ChainA-THR165-<br>Side.....ChainA-<br>SER179-Main | ChainB-ILE227-<br>Main.....ChainB-<br>TYR236-Main | ChainA-LEU184-<br>Main.....ChainA-<br>ALA134-Main |
| 6   | ChainC-GLY188-<br>Main.....ChainC-<br>ASP185-Main | ChainB-ALA141-<br>Main.....ChainB-<br>SER131-Main | ChainB-SER222-<br>Side.....ChainB-<br>MET242-Main | ChainA-LEU4-<br>Main.....ChainA-<br>PHE101-Main   |
| 7   | ChainC-THR224-<br>Side.....ChainC-<br>HIS217-Main | ChainB-ALA363-<br>Main.....ChainB-<br>MET413-Main | ChainB-ASN254-<br>Main.....ChainB-<br>GLU291-Main | ChainA-SER180-<br>Side.....ChainA-<br>SER179-Main |
| 8   | ChainA-THR107-<br>Main.....ChainA-<br>ASN103-Main | ChainB-ARG40-<br>Main.....ChainB-<br>GLU48-Main   | ChainB-MET450-<br>Main.....ChainB-<br>ARG255-Main | ChainA-SER183-<br>Main.....ChainA-<br>GLY162-Main |
| 9   | ChainB-LEU302-<br>Main.....ChainB-<br>LYS298-Main | ChainB-HIS414-<br>Side.....ChainB-<br>ASP361-Main | ChainB-SER446-<br>Side.....ChainB-<br>TYR417-Main | ChainA-SER69-<br>Main.....ChainA-<br>THR72-Main   |
| 10  | ChainC-ASP285-<br>Main.....ChainC-<br>THR259-Main | ChainB-ILE321-<br>Main.....ChainB-<br>TYR304-Main |                                                   | ChainA-THR118-<br>Main.....ChainA-<br>SER141-Main |
| 11  | ChainC-VAL122-<br>Main.....ChainC-<br>ASN118-Main | ChainB-ILE362-<br>Main.....ChainB-<br>SER360-Main |                                                   | ChainB-ALA172-<br>Main.....ChainB-<br>GLN109-Side |
| 12  |                                                   | ChainB-LEU84-<br>Main.....ChainB-<br>LEU18-Main   |                                                   | ChainB-ASN62-<br>Side.....ChainB-<br>TRP49-Main   |
| 13  |                                                   | ChainB-LYS210-<br>Side.....ChainB-<br>ASN208-Main |                                                   | ChainB-ASP386-<br>Main.....ChainB-<br>ASP384-Side |

---

|    |                                           |                                           |
|----|-------------------------------------------|-------------------------------------------|
| 14 | ChainB-SER184-Side.....ChainB-THR169-Side | ChainB-ASP386-Side.....ChainB-SER388-Side |
| 15 | ChainB-SER207-Side.....ChainB-HIS204-Side | ChainB-LYS210-Side.....ChainD-ASP212-Main |
| 16 | ChainB-THR379-Main.....ChainB-TYR392-Main | ChainD-THR21-Main.....ChainD-SER7-Main    |
| 17 | ChainD-ASN62-Main.....ChainD-ILE50-Main   | ChainB-THR284-Side.....ChainB-SER283-Main |
| 18 | ChainB-VAL185-Main.....ChainB-HIS168-Main | ChainB-TYR281-Main.....ChainB-THR284-Main |
| 19 | ChainB-VAL269-Main.....ChainB-TRP262-Main | ChainB-TYR281-Main.....ChainB-THR284-Main |
| 20 | ChainC-LEU139-Main.....ChainC-THR120-Main | ChainC-LEU139-Main.....ChainC-THR120-Main |
| 21 | ChainC-LEU184-Main.....ChainC-ALA134-Main | ChainC-THR105-Side.....ChainC-PRO7-Main   |
| 22 | ChainC-THR166-Main.....ChainC-SER179-Main | ChainD-GLN371-Side.....ChainD-GLU373-Side |
| 23 | ChainC-TYR195-Main.....ChainC-ALA211-Main | ChainD-ILE53-Main.....ChainD-TRP36-Main   |
| 24 | ChainD-GLN152-Side.....ChainD-LEU112-Main | ChainD-LEU112-Main.....ChainD-GLN152-Main |
| 25 | ChainD-THR135-Side.....ChainD-THR139-Main |                                           |
| 26 | ChainD-THR139-Side.....ChainB-PRO276-Main |                                           |

---

Table S9. The number of disulfide bond, H-bond, salt-bridge and hydrophobic interaction of each protein.

| Parameters     | BSA | FIB | IgG  |
|----------------|-----|-----|------|
| Disulfide bond | 17  | 11  | 12   |
| H-bond         | 326 | 544 | 590  |
| Salt-bridge    | 63  | 92  | 72   |
| Hydrophobic    | 52  | 88  | 105  |
| aa             | 583 | 956 | 1288 |

## References

- 1 C. Rodriguez-Quijada, H. de Puig, M. Sanchez-Purra, C. Yelleswarapu, J. J. Evans, J. P. Celli and K. Hamad-Schifferli, *ACS Appl. Mater. Inter.*, 2019, **11**, 14588-14596.
- 2 M. Hadjidemetriou, Z. Al-Ahmady, M. Mazza, R. F. Collins, K. Dawson and K. Kostarelos, *Acs Nano*, 2015, **9**, 8142-8156.
- 3 A. Cox, P. Andreozzi, R. Dal Magro, F. Fiordaliso, A. Corbelli, L. Talamini, C. Chinello, F. Raimondo, F. Magni, M. Tringali, S. Krol, P. J. Silva, F. Stellacci, M. Masserini and F. Re, *Acs Nano*, 2018, **12**, 7292-7300.
- 4 Z. Ban, P. Yuan, F. Yu, T. Peng, Q. Zhou and X. Hu, *Proc. Natl. Acad. Sci. U.S.A.*, 2020, **117**, 10492-10499.
- 5 J. Simon, L. K. Mueller, M. Kokkinopoulou, I. Lieberwirth, S. Morsbach, K. Landfester and V. Mailaender, *Nanoscale*, 2018, **10**, 10731-10739.
- 6 O. K. Kari, J. Ndika, P. Parkkila, A. Louna, T. Lajunen, A. Puustinen, T. Viitala, H. Alenius and A. Urtti, *Nanoscale*, 2020, **12**, 1728-1741.
- 7 G. Maiorano, S. Sabella, B. Sorce, V. Brunetti, M. A. Malvindi, R. Cingolani and P. P. Pompa, *Acs Nano*, 2010, **4**, 7481-7491.
- 8 K. Yang, B. Mesquita, P. Horvatovich and A. Salvati, *Acta Biomater.*, 2020, **106**, 314-327.
- 9 V. Francia, K. Yang, S. Deville, C. Reker-Smit, I. Nelissen and A. Salvati, *Acs Nano*, 2019, **13**, 11107-11121.
- 10 S. Palchetti, V. Colapicchioni, L. Digiaco, G. Caracciolo, D. Pozzi, A. L. Capriotti, G. La Barbera and A. Lagana, *BBA-Biomembranes*, 2016, **1858**, 189-196.
- 11 S. Staufenbiel, M. Merino, W. Li, M.-D. Huang, S. Baudis, A. Lendlein, R. H. Mueller and C. Wischke, *Int. J. Pharmaceut.*, 2015, **485**, 87-96.



- 
- 12 F. Xu, M. Reiser, X. Yu, S. Gummuluru, L. Wetzler and B. M. Reinhard, *Acs Nano*, 2016, **10**, 1189-1200.
  - 13 V. Gorshkov, J. A. Bubis, E. M. Solovyeva, M. V. Gorshkov and F. Kjeldsen, *Environ. Sci-Nano*, 2019, **6**, 1089-1098.
  - 14 X. Wang, X. Wang, M. Wang, D. Zhang, Q. Yang, T. Liu, R. Lei, S. Zhu, Y. Zhao and C. Chen, *Small*, 2018, **14**.
  - 15 J. Ashby, S. Schachermeyer, S. Pan and W. Zhong, *Anal. Chem.*, 2013, **85**, 7494-7501.
  - 16 J.-T. Tai, C.-S. Lai, H.-C. Ho, Y.-S. Yeh, H.-F. Wang, R.-M. Ho and D.-H. Tsai, *Langmuir*, 2014, **30**, 12755-12764.
  - 17 C. Roecker, M. Poetzl, F. Zhang, W. J. Parak and G. U. Nienhaus, *Nat. Nanotechnol.*, 2009, **4**, 577-580.
  - 18 T. Matsuo, *Biochem. Bioph. Res. Co.*, 2020, **525**, 830-835.
  - 19 H. D. T. Mertens and D. I. Svergun, *J. Struct. Biol.*, 2010, **172**, 128-141.
  - 20 P. Bernado and D. I. Svergun, *Mol. Biosyst.*, 2012, **8**, 151-167.
  - 21 Z. Zeng, X. Shi, T. Mabe, S. Christie, G. Gilmore, A. W. Smith and J. Wei, *Anal. Chem.*, 2017, **89**, 5221-5229.
  - 22 D. Maiolo, L. Paolini, G. Di Noto, A. Zendrini, D. Berti, P. Bergese and D. Ricotta, *Anal. Chem.*, 2015, **87**, 4168-4176.
  - 23 K. Saha, M. Rahimi, M. Yazdani, S. T. Kim, D. F. Moyano, S. Hou, R. Das, R. Mout, F. Rezaee, M. Mahmoudi and V. M. Rotello, *Acs Nano*, 2016, **10**, 4421-4430.
  - 24 A. J. Chetwynd, W. Zhang, J. A. Thorn, I. Lynch and R. Ramautar, *Small*, 2020, **16**.
  - 25 H. Zhang, T. Wu, W. Yu, S. Ruan, Q. He and H. Gao, *ACS Appl. Mater. Inter.*, 2018, **10**, 9094-9103.
  - 26 S. Kihara, N. J. van der Heijden, C. K. Seal, J. P. Mata, A. E. Whitten, I. Koper and D. J. McGillivray, *Bioconjugate Chem.*, 2019, **30**, 1067-1076.
  - 27 X. Wang, M. Wang, R. Lei, S. F. Zhu, Y. Zhao and C. Chen, *ACS nano*, 2017, **11**, 4606-4616.
  - 28 F. Tavanti, A. Pedone and M. C. Menziani, *Int. J. Mol. Sci.*, 2019, **20**.
  - 29 J. Saavedra, S. Stoll and V. I. Slaveykova, *Environ. Pollut.*, 2019, **252**, 715-722.
